# Supplementary material for: Somatic mutations in plasma cell-free DNA are diagnostic markers for esophageal squamous cell carcinoma recurrence
Source: PubMed Central journal article supplement (PMC5308726; doi:10.18632/oncotarget.11409), 2016-08-19
Supplement: oncotarget-07-62280-s001.pdf [file oncotarget-07-62280-s001.pdf]

## **Somatic mutations in plasma cell-free DNA are diagnostic markers for esophageal squamous cell carcinoma recurrence**

### **SUPPLEMENTARY TABLES**

**Supplementary Table S1: Somatic mutations in tumor samples and matched cfDNA in plasma.**

**Supplementary File 1**

**Supplementary Table S2: cfDNA concentration and allele frequencies of concordant mutation in plasma and tumor markers in serum under surveillance in 13 ESCC patients.**

**Supplementary File 2**

**Supplementary Table S3: Comprehensive sequencing panel of 53 genes.**

**Supplementary File 3**
